# Supplementary material for: The Prevalence, Genotype Distribution and Risk Factors of Human Papillomavirus in Tunisia: A National-Based Study
Source: MDPI journal article supplement (doi:10.3390/v14102175), 2022-09-30
Supplement: s1 [file s1]

**Table S4. Univariate analysis for the identification of potential risk factors related to HPV infection in Tunisia**

| Variable                        | N    | n  | Prevalence % | OR    | CI95%    | p       |
|---------------------------------|------|----|--------------|-------|----------|---------|
| Grand-Region                    |      |    |              |       |          |         |
| Grand Tunis                     | 327  | 43 | 13.1         | 6.4   | 2.8-14.6 | <0.001  |
| South                           | 172  | 20 | 11.6         | 5.2   | 2.1-12.7 |         |
| Central                         | 427  | 27 | 6.3          | 2.8   | 1.2-6.6  |         |
| North                           | 303  | 6  | 2.0          | Ref   |          |         |
| Age group                       |      |    |              |       |          |         |
| <30                             | 202  | 25 | 12.4         | 2.0   | 1.1-3.6  | 0.055   |
| 30-40                           | 441  | 31 | 7.0          | 1.071 | 0.6-1.8  |         |
| >50                             | 423  | 13 | 8.1          | 1.406 | 0.7-2.7  |         |
| 40-50                           | 160  | 27 | 6.4          | Ref   |          |         |
| Marital status                  |      |    |              |       |          |         |
| Single                          | 68   | 16 | 23.5         | 4.158 | 2.2-7.6  | <0.001  |
| Married                         | 1161 | 80 | 6.9          | Ref   |          |         |
| Professional activity           |      |    |              |       |          |         |
| yes                             | 360  | 40 | 6.4          | 0.551 | 0.3-0.8  | 0.006   |
| non                             | 869  | 56 | 11.1         | Ref   |          |         |
| Educational level               |      |    |              |       |          |         |
| Illiterate                      | 253  | 14 | 5.5          | Ref   |          | 0.2     |
| Primary level                   | 490  | 39 | 8            | 1.476 | 0.8-2.7  |         |
| Secondary and high level        | 480  | 43 | 9            | 1.680 | 0.9-3.1  |         |
| Housing type                    |      |    |              |       |          |         |
| Traditional house               | 530  | 41 | 7.7          | 0.9   | 0.5-1.4  | 0.579   |
| Villa                           | 570  | 41 | 7.2          | Ref   |          |         |
| Apartment                       | 110  | 12 | 10.9         | 0.6   | 0.3-1.2  |         |
| Rudimentary                     | 19   | 12 | 10.5         | 0.6   | 0.1-2.9  |         |
| Monthly household income ( TND) |      |    |              |       |          |         |
| >700                            | 289  | 28 | 9.7          | 1.5   | 0.9-2.7  | 0.22    |
| 350-700                         | 472  | 31 | 6.6          | 1.0   | 0.6-1.7  |         |
| <350                            | 420  | 27 | 6.4          | Ref   |          |         |
| Smoking                         |      |    |              |       |          |         |
| yes                             | 1157 | 19 | 26.4         | 5.0   | 2.8-8.9  | <0.0001 |

|                                               |      |    |      |     |         |        |
|-----------------------------------------------|------|----|------|-----|---------|--------|
| no                                            | 72   | 77 | 6.7  | Ref |         |        |
| <b>Medical history</b>                        |      |    |      |     |         |        |
| yes                                           | 367  | 29 | 7.9  | 1.0 | 0.6-1.6 | 0.861  |
| no                                            | 854  | 65 | 7.6  | Ref |         |        |
| <b>Surgical history</b>                       |      |    |      |     |         |        |
| yes                                           | 446  | 40 | 9    | 1.2 | 0.8-1.9 | 0.232  |
| non                                           | 778  | 55 | 7.1  | Ref |         |        |
| <b>Menopause</b>                              |      |    |      |     |         |        |
| yes                                           | 235  | 16 | 6.8  | 0.8 | 0.4-1.4 | 0.533  |
| no                                            | 985  | 79 | 8    | Ref |         |        |
| <b>Pregnancy</b>                              |      |    |      |     |         |        |
| yes                                           | 82   | 8  | 9.8  | 1.3 | 0.6-2.7 | 0.5    |
| no                                            | 1029 | 79 | 7.7  | Ref |         |        |
| <b>Contraception</b>                          |      |    |      |     |         |        |
| yes                                           | 699  | 56 | 8    | 1.1 | 0.7-1.7 | 0.59   |
| no                                            | 475  | 34 | 7.2  | Ref |         |        |
| <b>Gestality</b>                              |      |    |      |     |         |        |
| o                                             | 45   | 5  | 11.1 | 1.5 | 0.5-3.8 | 0.401  |
| >1                                            | 1171 | 9  | 7.7  | Ref |         |        |
| <b>Parity</b>                                 |      |    |      |     |         |        |
| 0                                             | 69   | 10 | 14.5 | 0.3 | 0.1-0.7 |        |
| [1-2]                                         | 436  | 41 | 9.4  | 0.6 | 0.3-0.9 |        |
| >3                                            | 701  | 42 | 6    | Ref |         |        |
| <b>Age at first intercourse</b>               |      |    |      |     |         |        |
| <20                                           | 394  | 33 | 8.4  | 1.3 | 0.8-2.1 | 0.205  |
| >=20                                          | 755  | 48 | 6.4  | Ref |         |        |
| <b>History of TSI</b>                         |      |    |      |     |         |        |
| yes                                           | 240  | 29 | 12.1 | 1.9 | 1.2-3.0 | 0.363  |
| no                                            | 977  | 65 | 6.7  | Ref |         |        |
| <b>Number of partner</b>                      |      |    |      |     |         |        |
| unique partner                                | 941  | 51 | 5.4  | Ref |         |        |
| multiple partner                              | 169  | 27 | 16   | 0.3 | 0.1-0.4 | <0.001 |
| <b>Multiple sexual intercourse of partner</b> |      |    |      |     |         |        |
| yes                                           | 79   | 14 | 17.7 | 0.3 | 0.1-0.5 | <0.001 |

|          |      |    |      |     |          |
|----------|------|----|------|-----|----------|
| not sure | 1100 | 6  | 28.6 | 0.1 | 0.06-0.4 |
| no       | 21   | 70 | 6.4  | Ref |          |

---

Ref: reference category
