# Supplementary material for: The Prevalence, Genotype Distribution and Risk Factors of Human Papillomavirus in Tunisia: A National-Based Study
Source: MDPI journal article supplement (doi:10.3390/v14102175), 2022-09-30
Supplement: s1 [file s1]

**Table S3. HPV types distribution according to cytological profile**

|              | <b>Normal<br/>Cytology</b> | <b>Cytology with benign<br/>transformation</b> | <b>Cytology with intraepithelial<br/>lesions</b> |
|--------------|----------------------------|------------------------------------------------|--------------------------------------------------|
| <b>HPV11</b> | 1(2%)                      | 1(2.8%)                                        | 1(10%)                                           |
| <b>HPV59</b> | 7(14%)                     | 1(12.5%)                                       | 0                                                |
| <b>HPV6</b>  | 9(18%)                     | 5(13.9%)                                       | 6                                                |
| <b>HPV40</b> | 9(18%)                     | 3(8.3%)                                        | 1(10%)                                           |
| <b>HPV70</b> | 2(4%)                      | 2(5.6%)                                        | 0                                                |
| <b>HPV74</b> | 5(10%)                     | 0                                              | 0                                                |
| <b>HPV16</b> | 7(14%)                     | 4(11.1%)                                       | 0                                                |
| <b>HPV31</b> | 5(10%)                     | 6(16.7%)                                       | 1(10%)                                           |
| <b>HPV35</b> | 1(2%)                      | 1(2.8%)                                        | 0                                                |
| <b>HPV39</b> | 1(2%)                      | 1(2.8%)                                        | 0                                                |
| <b>HPV52</b> | 4(8%)                      | 2(5.6%)                                        | 1(10%)                                           |
| <b>HPV54</b> | 1(2%)                      | 0                                              | 1(10%)                                           |
| <b>HPV53</b> | 2(4%)                      | 1(2.8%)                                        | 1(10%)                                           |
| <b>HPV58</b> | 0                          | 2(5.6%)                                        | 0                                                |
| <b>HPV62</b> | 1(2%)                      | 1(2.8%)                                        | 0                                                |
| <b>HPV66</b> | 2(4%)                      | 1(2.8%)                                        | 0                                                |
| <b>HPV68</b> | 2(4%)                      | 3(8.3%)                                        | 1(10%)                                           |
| <b>HPV56</b> | 0                          | 2(5.6%)                                        | 0                                                |
| <b>HPV42</b> | 6                          | 2(5.6%)                                        | 0                                                |
| <b>HPV43</b> | 0                          | 0                                              | 1(10%)                                           |
| <b>HPV44</b> | 0                          | 1(2.8%)                                        | 0                                                |
| <b>HPV81</b> | 1(2%)                      | 1(2.8%)                                        | 1(10%)                                           |
| <b>HPV84</b> | 0                          | 1(2.8%)                                        | 0                                                |
| <b>HPV89</b> | 1(2%)                      | 1(2.8%)                                        | 1(10%)                                           |
| <b>HPV18</b> | 2(4%)                      | 2(5.6%)                                        | 0                                                |
