# Supplementary material for: The Prevalence, Genotype Distribution and Risk Factors of Human Papillomavirus in Tunisia: A National-Based Study
Source: MDPI journal article supplement (doi:10.3390/v14102175), 2022-09-30
Supplement: s1 [file s1]

**Table S2. Comparison between women with  $\beta$ -globin positive and  $\beta$ -globin negative PCR (N<sub>T</sub>=1482)**

|                                         | Positive β-globin n(%*) | Negative β-globin n(%*) | P     |
|-----------------------------------------|-------------------------|-------------------------|-------|
| Collection center(N=1482)               |                         |                         |       |
| CSR                                     | 642(43.3%)              | 117(7.9%)               | 0.082 |
| CSRS                                    | 587(39.6%)              | 136(9.2%)               |       |
| Age                                     |                         |                         |       |
| <=20                                    | 9(0.6%)                 | 0                       | 0.603 |
| [20-30[                                 | 162(11%)                | 39(2.7%)                |       |
| [30-40[                                 | 426(29%)                | 95(6.5%)                |       |
| [40-50[                                 | 432(29.4%)              | 83(6.5%)                |       |
| [50-60[                                 | 165(11.2%)              | 31(2.1%)                |       |
| >60                                     | 24(1.6%)                | 5(0.3%)                 |       |
| Education level (N=1474*)               |                         |                         |       |
| Illiterate                              | 253(17.2%)              | 49(3.3%)                | 0.653 |
| Primary school                          | 490(33.2)               | 100(6.8)                |       |
| Basic school                            | 91(6.2%)                | 21(1.4%)                |       |
| High school                             | 272(18.5%)              | 55(3.7%)                |       |
| Professional                            | 13(0.9%)                | 6(0.4%)                 |       |
| College                                 | 104(7.1%)               | 20(1.4%)                |       |
| Missing data                            |                         |                         |       |
| Marital status(N=1482)                  |                         |                         |       |
| Married                                 | 68                      | 14                      | 1     |
| Single (widow, divorced, never married) | 1161                    | 239                     |       |
| Missing data                            |                         |                         |       |
| Monthly income (N=1428*)                |                         |                         |       |
| < 350TDN                                | 420(29.4%)              | 78(5.5%)                | 0.440 |
| [350TDN-700TDN]                         | 463(32.4%)              | 106(7.4%)               |       |

|                           |             |            |        |
|---------------------------|-------------|------------|--------|
| >700TDN                   | 298(20.9%)  | 63(4.4%)   |        |
| Missing data              |             |            |        |
| Housing type (N=1482)     |             |            |        |
| Traditional house         | 530(35.8%)  | 100(6.7%)  |        |
| Villa                     | 570(38.5%)  | 126(8.5%)  |        |
| Apartment                 | 110(7.4%)   | 21(1.4%)   | 0.550  |
| Rudimentary               | 19(1.3%)    | 6(0.4%)    |        |
| Missing data              |             |            |        |
| Occupation (N=1482)       |             |            |        |
| Yes                       | 360(24.3%)  | 63(4.3%)   | 0.159  |
| No                        | 869(58.6%)  | 190(12.8%) |        |
| Missing data              |             |            |        |
| Smoking(N=1482)           |             |            |        |
| Yes                       | 72(4.9%)    | 10(0.7%)   | 0.227  |
| No                        | 1157(78.1%) | 243(16.4%) |        |
| Missing data              |             |            |        |
| Menopause(N=1471*)        |             |            |        |
| Yes                       | 235(16%)    | 45(3.1%)   | 0.624  |
| Non                       | 985(67%)    | 206(14%)   |        |
| Pregnancy(N=1344*)        |             |            |        |
| Yes                       | 82(6.1%)    | 25(1.9%)   | 0.086  |
| No                        | 1029(76.6%) | 208(15.5%) |        |
| Missing data              |             |            |        |
| Contraception(N=1421*)    |             |            |        |
| Yes                       | 699(49.2%)  | 143(10.1%) | 0.2632 |
| Non                       | 475(33.4%)  | 104(7.3%)  |        |
| Missing data              |             |            |        |
| Medical history (N=1477*) |             |            |        |
| Yes                       | 367(24.9%)  | 77(5.2%)   | 0.875  |
| No                        | 854(58%)    | 175(11.9%) |        |

|                                                         |            |            |       |
|---------------------------------------------------------|------------|------------|-------|
| Missing data                                            |            |            |       |
| <b>Surgical history (N=1476*)</b>                       |            |            |       |
| Yes                                                     | 446(30.2%) | 113(7.7%)  |       |
| No                                                      | 778(52.7%) | 139(9.4%)  |       |
| Missing data                                            |            |            |       |
| <b>STI history (N=1465*)</b>                            |            |            |       |
| Yes                                                     | 240(16.4%) | 53(3.6%)   | 0.554 |
| No                                                      | 977(66.7%) | 195(13.3%) |       |
| Missing data                                            |            |            |       |
| <b>Multiple sexual intercourse of partner (N=1450*)</b> |            |            |       |
| Yes                                                     | 79(5.4%)   | 17(1.2%)   | 0.778 |
| No                                                      | 110(75.9%) | 227(15.7%) |       |
| Not sure                                                | 21(1.4%)   | 6(0.4%)    |       |
| Missing data                                            |            |            |       |
| <b>Age of first sexual intercourse (N=1382*)</b>        |            |            |       |
| ≤ 20 years                                              | 394(28.5%) | 74(5.4%)   | 0.457 |
| >20 years                                               | 755(54.6%) | 159(11.5%) |       |
| Missing data                                            |            |            |       |
| <b>Multiple sexual intercourse (N=1334*)</b>            |            |            |       |
| One partner                                             | 943(70.7%) | 198(14.8%) | 0.291 |
| Two partners                                            | 30(2.2%)   | 8(0.6%)    |       |
| More than two partner                                   | 21(1.6%)   | 3(0.2%)    |       |
| Does not wish to reply                                  | 116(8.7%)  | 15(1.1%)   |       |
| Missing data                                            |            |            |       |

\* difference between N<sub>T</sub> and N is due to missing data; STI: sexual transmitted infection
