# Supplementary material for: The Prevalence, Genotype Distribution and Risk Factors of Human Papillomavirus in Tunisia: A National-Based Study
Source: MDPI journal article supplement (doi:10.3390/v14102175), 2022-09-30
Supplement: s1 [file s1]

**Table S1. Representation of grand-regions, regions and governorates implicated in the study**

| <b>Grand-regions</b> | <b>Regions</b> | <b>Governorates</b> | <b>N</b> |
|----------------------|----------------|---------------------|----------|
| Grand Tunis          | Grand Tunis    | TUNIS               | 153      |
|                      |                | ARIANA              | 80       |
|                      |                | BEN AROUS           | 94       |
| North                | North-East     | MANOUBA             | 65       |
|                      |                | NABEUL              | 99       |
|                      |                | ZAGHOUAN            | 25       |
|                      | North-West     | BIZERTE             | 82       |
|                      |                | BEJA                | 39       |
|                      |                | JENDOUBA            | 60       |
| Center               | Center-East    | KEF                 | 38       |
|                      |                | SILIANA             | 35       |
|                      |                | SOUSSE              | 80       |
|                      |                | MONASTIR            | 73       |
|                      |                | MAHDIA              | 53       |
|                      | Center-West    | SFAX                | 121      |
|                      |                | KAIROUAN            | 80       |
|                      |                | KASSERINE           | 53       |
|                      |                | SIDI_BOUZID         | 59       |
|                      |                | GABES               | 53       |
| South                | South-East     | MEDENINE            | 66       |
|                      |                | TATAOUINE           | 20       |
|                      | South-West     | GAFSA               | 50       |
|                      |                | TOZEUR              | 18       |
|                      |                | KEBELI              | 21       |
|                      |                | Total               | 1517     |
